# Supplementary material
Source: Elsevier journal article supplement (https://www.sciencedirect.com/science/article/pii/S1885585724002676)
Supplement: mmc1 [file mmc1.doc]

**MATERIAL ADICIONAL**

**Figura 1 del material adicional.** Implantes de marcapasos sin cables, 2018-2023.

**Figura 2 del material adicional.** Distribución por comunidades autónomas y media nacional de los implantes de marcapasos sin cables, 2018-2023.

**Figura 3 del material adicional.** Diferencias regionales en las altas en la monitorización a distancia en 2023.
